# Supplementary material for: Ultrafast laser pulse (115 fs) generation by using direct bandgap ultrasmall 2D GaTe quantum dots
Source: Royal Society of Chemistry journal article supplement (doi:10.1039/c9tc00554d), 2019-01-01
Supplement: c9tc00554d1.pdf [file c9tc00554d1.pdf]

## Supporting Information

### **Ultrafast laser pulses (115 fs) generation by using the direct bandgap ultrasmall GaTe Quantum Dots**

Hui Long <sup>#1</sup>, Yihuan Shi <sup>#2</sup>, Qiao Wen <sup>\*2</sup>, Yuen Hong Tsang <sup>\*1</sup>

<sup>1</sup>*Department of Applied Physics and Materials Research Center, The Hong Kong Polytechnic University, Kowloon, Hong Kong, China*

<sup>2</sup>*Key Laboratory of Optoelectronic Devices and Systems of Ministry of Education and Guangdong Province, College of Optoelectronic Engineering, Shenzhen University, Shenzhen 518060, China.*

*† These authors contributed equally to this work. \* Correspondence and requests for materials should be addressed to Y. H. Tsang (email: yuen.tsang@polyu.edu.hk) or to Q. Wen (email: wenqiao@szu.edu.cn).*

| Saturable absorber      | Laser Type | Laser Properties |           |                 |                |                 | Ref. |
|-------------------------|------------|------------------|-----------|-----------------|----------------|-----------------|------|
|                         |            | Wavelength       | Bandwidth | Repetition rate | Pulse duration | Threshold power |      |
| Black                   | T/HDFL     | 1898 nm          | 3.9 nm    | 19.2 MHz        | 1.58 ps        | 150 mW          | 1    |
| Phosphorus QDs          | EDFL       | 1567.5 nm        | 2.4 nm    | 15.22 MHz       | 1.08 ps        | 50 mW           | 2    |
|                         | EDFL       | 1562.8 nm        | 10.7 nm   | 1036 MHz        | 291 fs         | 50 mW           | 3    |
|                         | EDFL       | 1561.7 nm        | 3.0 nm    | 5.47 MHz        | 882 fs         | N.A.            | 4    |
| CdSe QDs                | EDFL       | 1561.1 nm        | 0.7 nm    | 1 MHz           | 459 ns         | 113 mW          | 5    |
|                         | YDFL       | 1090 nm          | 0.5 nm    | 14.5 MHz        | 3.5 ps         | 310 mW          | 6    |
| CsPbBr <sub>3</sub> QDs | EDFL       | 1600 nm          | 4.5 nm    | 8.528 MHz       | 14.4 ps        | 110 mW          | 7    |
| PbSe QDs                | YDFL       | 1068 nm          | 4.5 nm    | 8.3 MHz         | 70 ps          | 110 mW          | 8    |
| PbS/CdS core/shell QDs  | EDFL       | 1562.5 nm        | 2.504 nm  | 3.302 MHz       | 54 ps          | N.A.            | 9    |
| PbS QDs                 | EDFL       | 1563 nm          | 4.7 nm    | 13.9 MHz        | 559 fs         | 50 mW           | 10   |
| NbSe <sub>2</sub> QDs   | EDFL       | 1556 nm          | 2.45 nm   | 7.7 MHz         | 756 fs         | 15 mW           | 11   |
|                         | YDFL       | 1033 nm          | 0.155 nm  | 12.3 MHz        | 380 ps         | 175 mW          |      |
| GaTe QDs                | EDFL       | 1530 nm          | 18.1 nm   | 8.79 MHz        | 115 fs         | 144 mW          | this |
|                         | YDFL       | 1030.72 nm       | 0.3 nm    | 11.73 MHz       | 752 ps         | 260 mW          | work |

Table S1. Nonlinear absorption coefficients of different quantum dot materials.

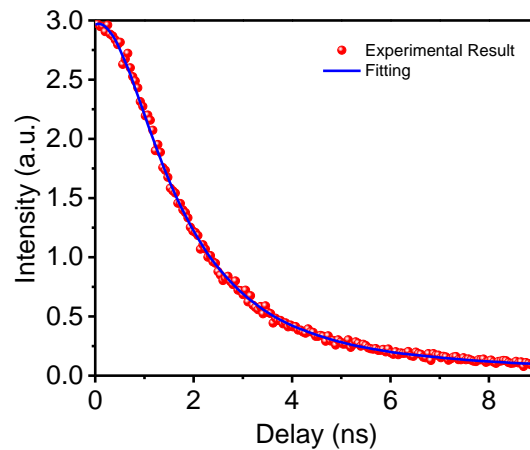

Fig. S1 The time-resolved decay spectra of GaTe quantum dots with a pump wavelength of 800 nm.

- 1 H. Yu, X. Zheng, K. Yin, X. A. Cheng and T. Jiang, *Appl. Opt.*, 2015, **54**, 10290–10294.
- 2 Y. Xu, Z. Wang, Z. Guo, H. Huang, Q. Xiao, H. Zhang and X. F. Yu, *Adv. Opt. Mater.*, 2016, **4**, 1223–1229.
- 3 M. Liu, X. F. Jiang, Y. R. Yan, X. De Wang, A. P. Luo, W. C. Xu and Z. C.

- Luo, *Opt. Commun.*, 2018, **406**, 85–90.
- 4 J. Du, M. Zhang, Z. Guo, J. Chen, X. Zhu, G. Hu, P. Peng, Z. Zheng and H. Zhang, *Sci. Rep.*, 2017, **7**, 1–10.
- 5 A. H. A. Rosol, H. A. Rahman, E. I. Ismail, Z. Jusoh, A. A. Latiff and S. W. Harun, *Chinese Opt. Lett.*, 2017, **15**, 071405.
- 6 M. B. H. Mahyuddin, A. A. Latiff, M. F. M. Rusdi, N. Irawati and S. W. Harun, *Opt. Commun.*, 2017, 397, 147–152.
- 7 B. Liu, L. Gao, W. W. Cheng, X. S. Tang, C. Gao, Y. L. Cao, Y. J. Li and T. Zhu, *Opt. Express*, 2018, **26**, 7155–7162.
- 8 K. Wei, S. Fan, Q. Chen and X. Lai, *Opt. Express*, 2017, **25**, 24901–24906.
- 9 N. Ming, S. Tao, W. Yang, Q. Chen, R. Sun, Ch. Wang, S. Wang, B. Man and H. Zhang, *Opt. Express*, 2018, **26**, 9017–9026.
- 10 L. Yun, Y. Qiu, C. Yang, J. Xing, K. Yu, X. Xu and W. Wei, *Photonics Res.*, 2018, **6**, 1028–1032.
- 11 Y. Shi, H. Long, S. Liu, Y. H. Tsang and Q. Wen, *J. Mater. Chem. C*, 2018, **6**, 12638–12642.
